# Supplementary material for: Plugged hexagonal templated silica: a unique micro- and mesoporous composite material with internal silica nanocapsulesElectronic supplementary information (ESI) available: Fig. S1: X-ray diffractogram of a PHTS material. Fig. S2: TEM images of SBA-15 and PHTS-2. Fig. S3: hydrothermal stabilities. See http://www.rsc.org/suppdata/cc/b2/b201424f/
Source: Royal Society of Chemistry journal article supplement (doi:10.1039/b201424f), 2002-04-08
Supplement: b201424f.doc [file b201424f.doc]

Supplementary Material (ESI) for Chemical Communications

This journal is © The Royal Society of Chemistry 2002

Plugged Hexagonal Templated Silica : A unique micro- and mesoporous composite material with internal silica nanocapsules.

P. Van Der Voort*,1, P. I. Ravikovitch†, K.P. De Jong‡, A.V. Neimark†, A.H. Janssen‡, M. Benjelloun*, E. Van Bavel*, P. Cool*, B. M. Weckhuysen‡ and E.F. Vansant*.

## SUPPLEMENTARY FIGURE 1 : X-Ray Diffractogram of a PHTS material

**SUPPLEMENTARY FIGURE 2 : HIGH RESOLUTION TEM PICTURES**

**
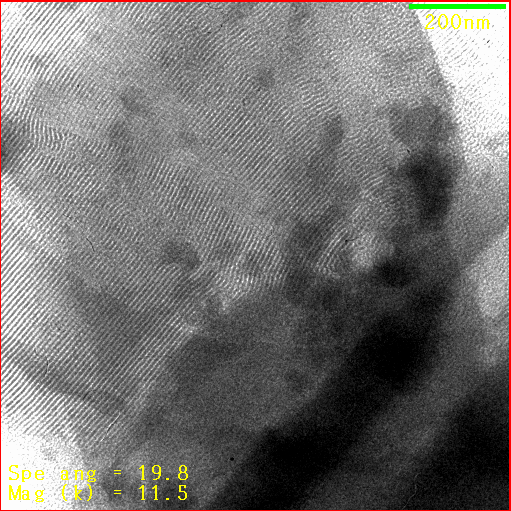
**

**
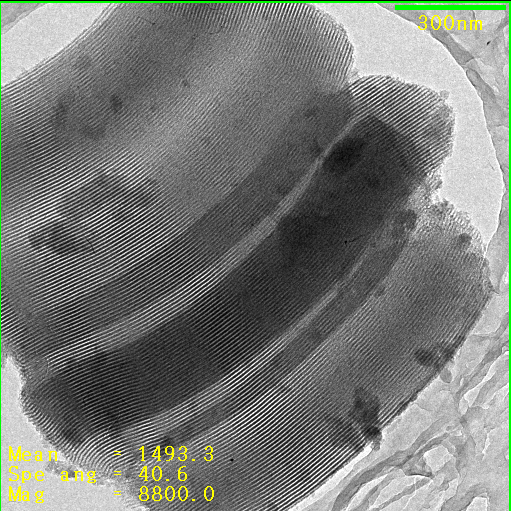
**

TEM pictures of SBA-15 (left) and PHTS-2 (right)

**SUPPLEMENTARY FIGURE 3 : HYDROTHERMAL STABILITY**

Hydrothermal stability of the most common mesoporous templated materials. Description of treatments : Mild : nitrogen flow (25% water) at 1013 hPa and 673 K for 50 hours; Medium : nitrogen flow (25% water) at 1013 hPa and 673 K for 120 hours; Hard : steaming on a grid above the water in an autoclave at 393 K and autogeneous pressure for 24 hours.
